# Supplementary material
Source: Springer Nature journal article supplement (https://www.springermedizin.de/resource/supplementary/12875_2014_1121_MOESM2_ESM.pdf/9435866)
Supplement: MOESM2 [file 9435866]

10,819,484 physician visits  
by 7,662,411 chronic disease patients

**Patients** excluded because they were not in  
the Manitoba Health Insurance Registry  
n = 230

**Visits** excluded because patients  
were < 19 years old  
n = 1,048,172

**Visits** excluded because death occurred during  
the study period  
n = 318,971

**Visits** excluded because patients did not have  
health coverage during the entire study period  
n = 683,495

**Visits** excluded because they were to  
alternate healthcare settings or providers  
n = 822,154

**Visits** excluded because patients resided in  
Northern Manitoba  
n = 261,298

**Visits** excluded because patients had fewer  
than 4 physician visits  
n = 22,753

**Study Cohort**  
7,662,411 physician visits  
by 347,606 chronic disease patients
